# Supplementary material for: The triglyceride-glucose index dynamic trajectory reveals the association between the clinical subphenotype of insulin resistance and mortality in patients with sepsis
Source: PubMed Central journal article supplement — BMC Infect Dis. 2024 Oct 1;24:1083. doi: 10.1186/s12879-024-10005-y (PMC11443761; doi:10.1186/s12879-024-10005-y), 2024-10-01
Supplement: 12879_2024_10005_MOESM2_ESM.pdf [file 12879_2024_10005_MOESM2_ESM.pdf]

Covariates

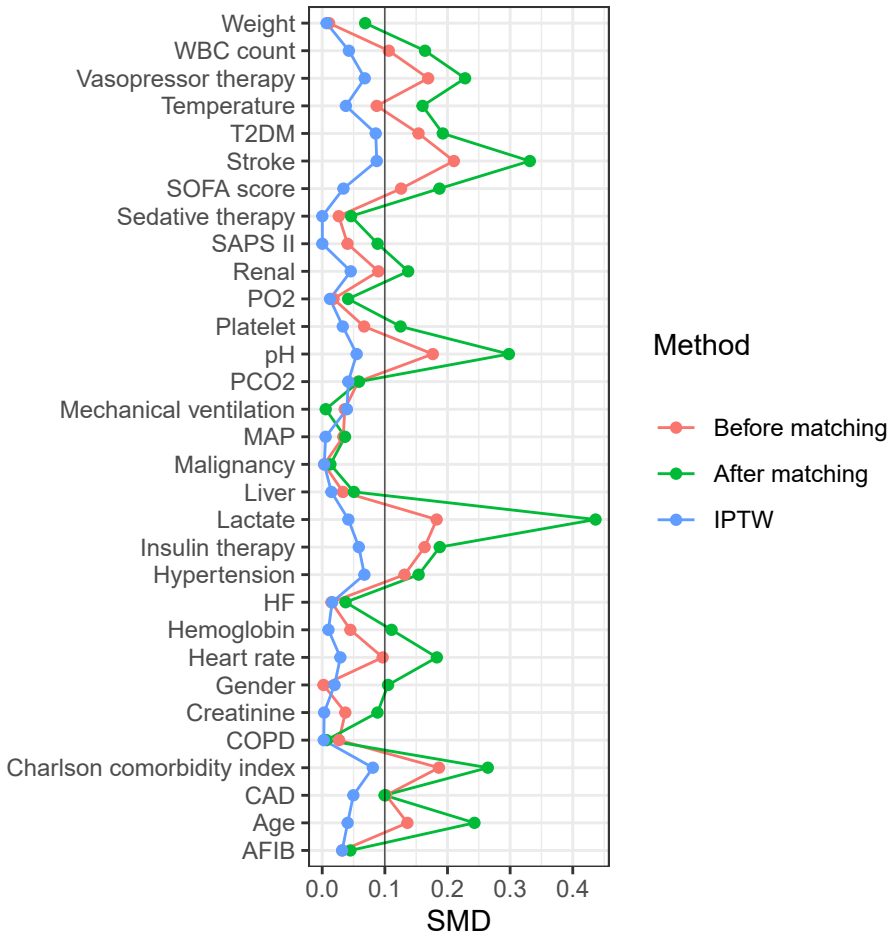

Fig S1: Change in standardized mean difference (SMD) before and after matching of cohort.

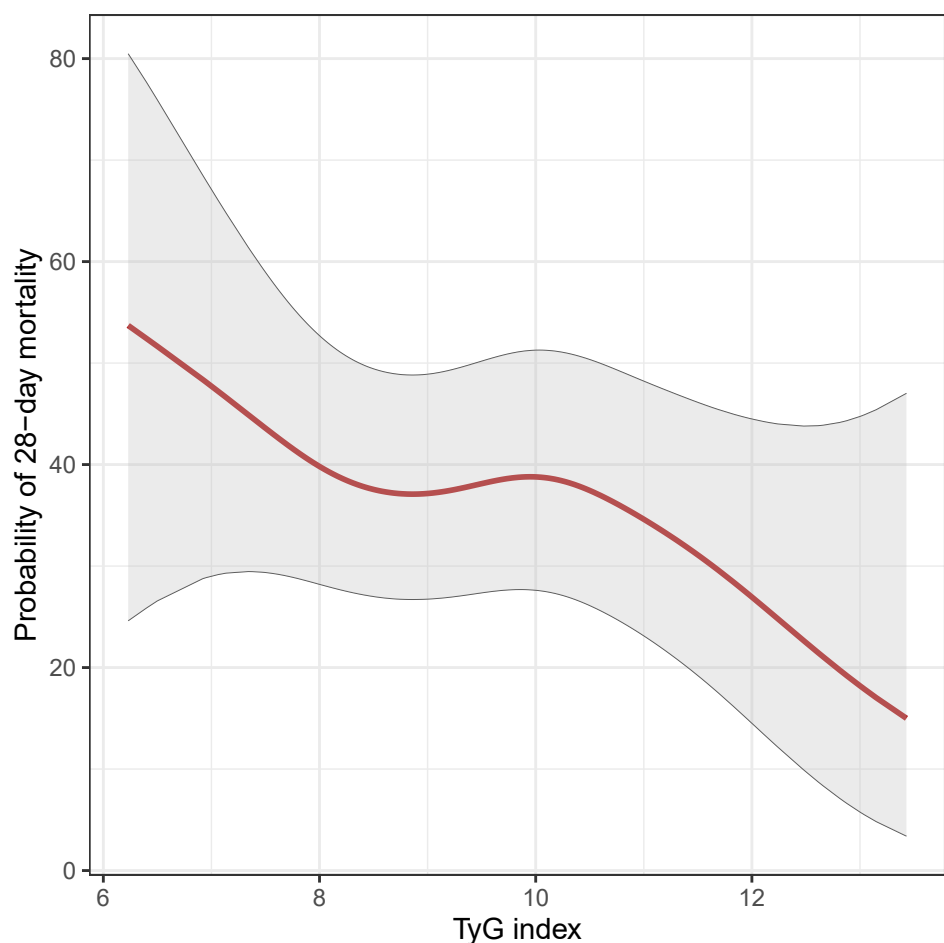

Fig.S2 The nonlinear negative relationship of TyG index and the risk of 28-day mortality fit by generalized additive model.

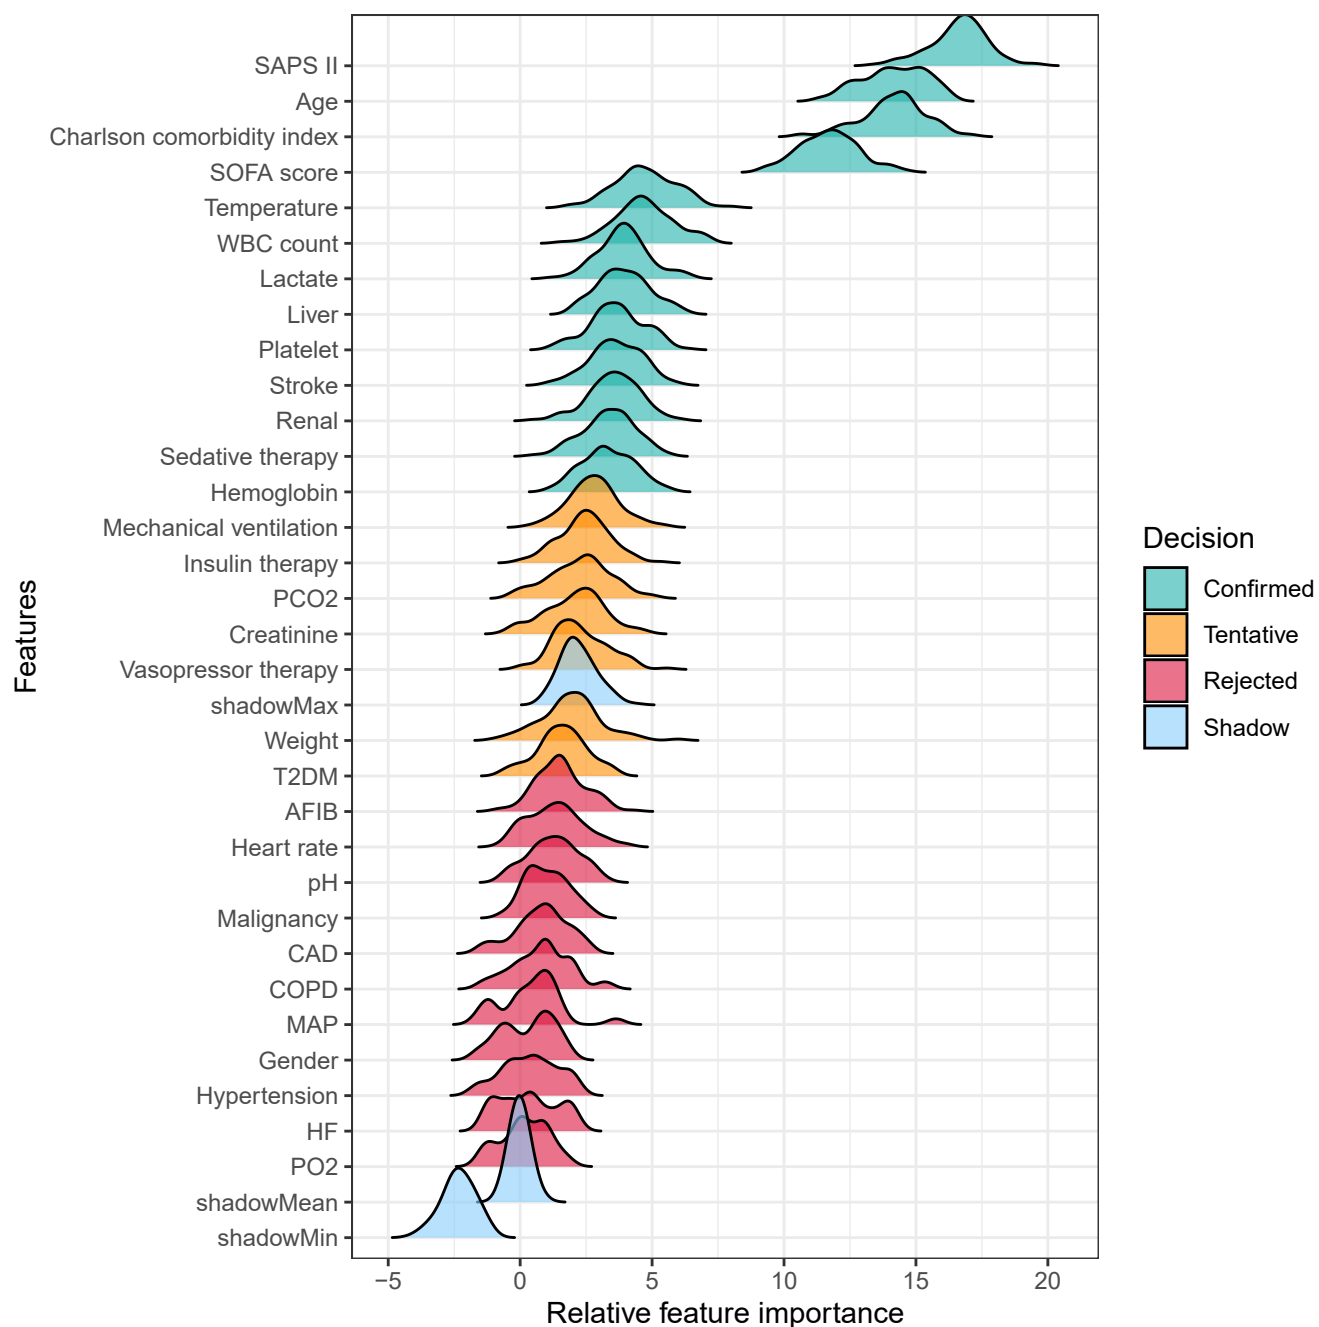

Fig.S3 Importance of each variable according to the Boruta feature selection.
